# Supplementary material for: T Cell Responses to Neural Autoantigens Are Similar in Alzheimer’s Disease Patients and Age-Matched Healthy Controls
Source: PubMed Central journal article supplement (PMC7481378; doi:10.3389/fnins.2020.00874), 2020-08-27
Supplement: Data_Sheet_1.pdf [file Data_Sheet_1.pdf]

Supplemental material

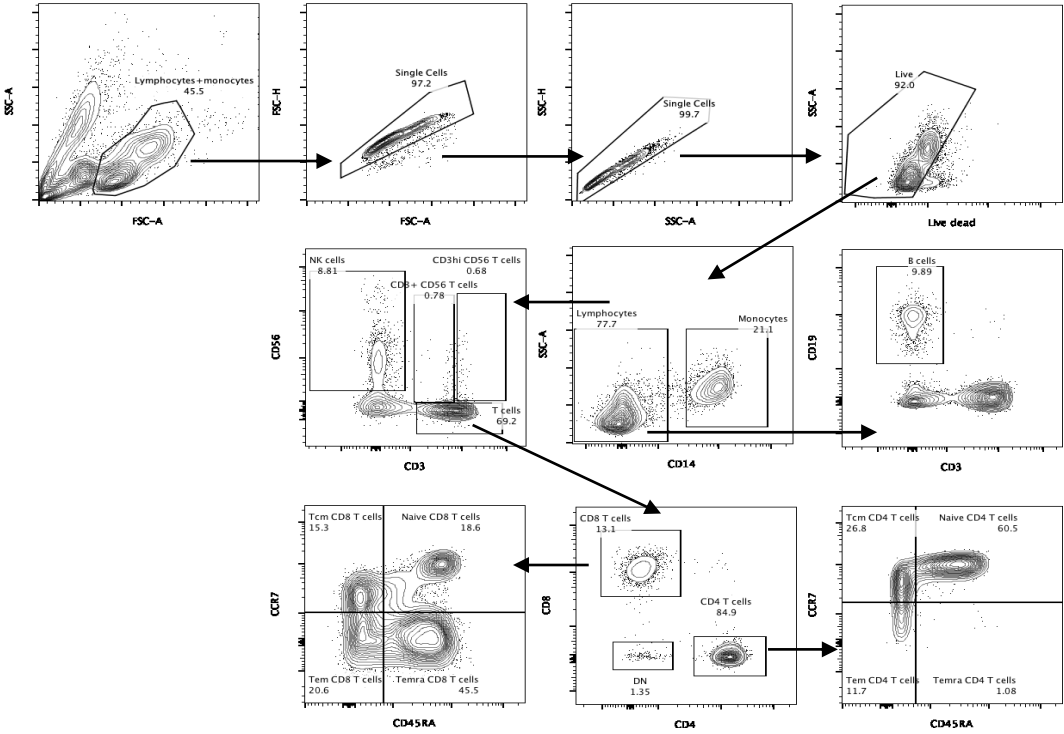

Fig S1. Gating strategy for each cell subset population.

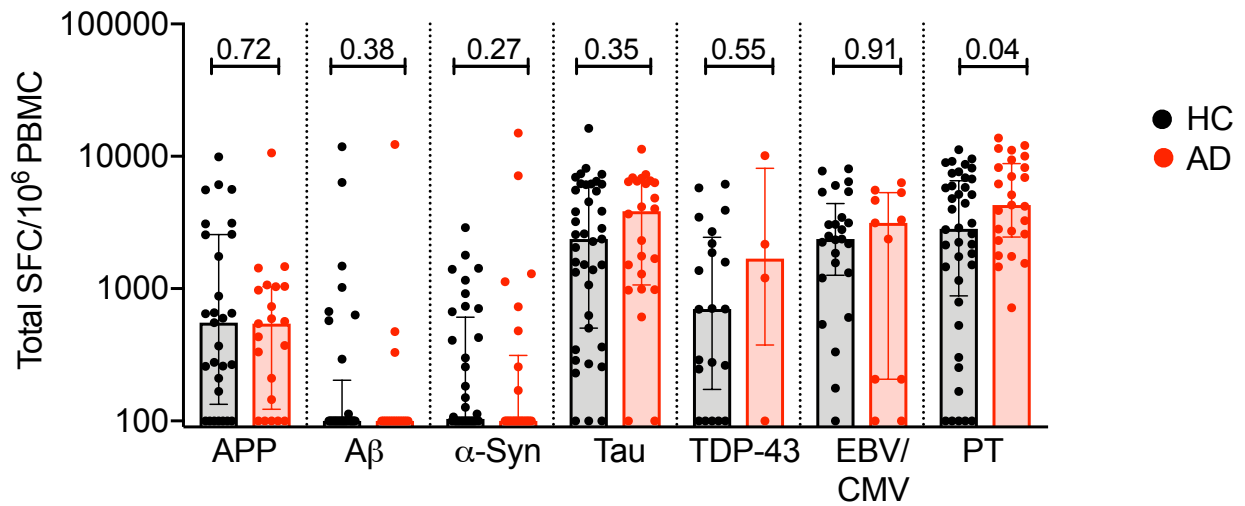

**Fig S2. T cell reactivity to APP, A $\beta$ ,  $\alpha$ -synuclein, tau, TDP-43, EBV/CMV, and PT in Caucasian AD and age-matched HC subjects.** Magnitude of total response (sum of IFN $\gamma$ , IL-5 and IL-10) in HC (black bar and circles) and AD (red bar and circles) to APP (HC, n=29; AD n=21), A $\beta$  (HC, n=33; AD, n=19),  $\alpha$ -syn (HC, n=36; AD, n=26), tau (HC, n=39; AD n=24), TDP-43 (HC, n=21; AD, n=4), EBV/CMV (HC, n=25; AD, n=11), and PT (HC, n=40; AD, n=25). Each dot represents a subject. Median  $\pm$  interquartile range is shown. Two-tailed Mann-Whitney test.

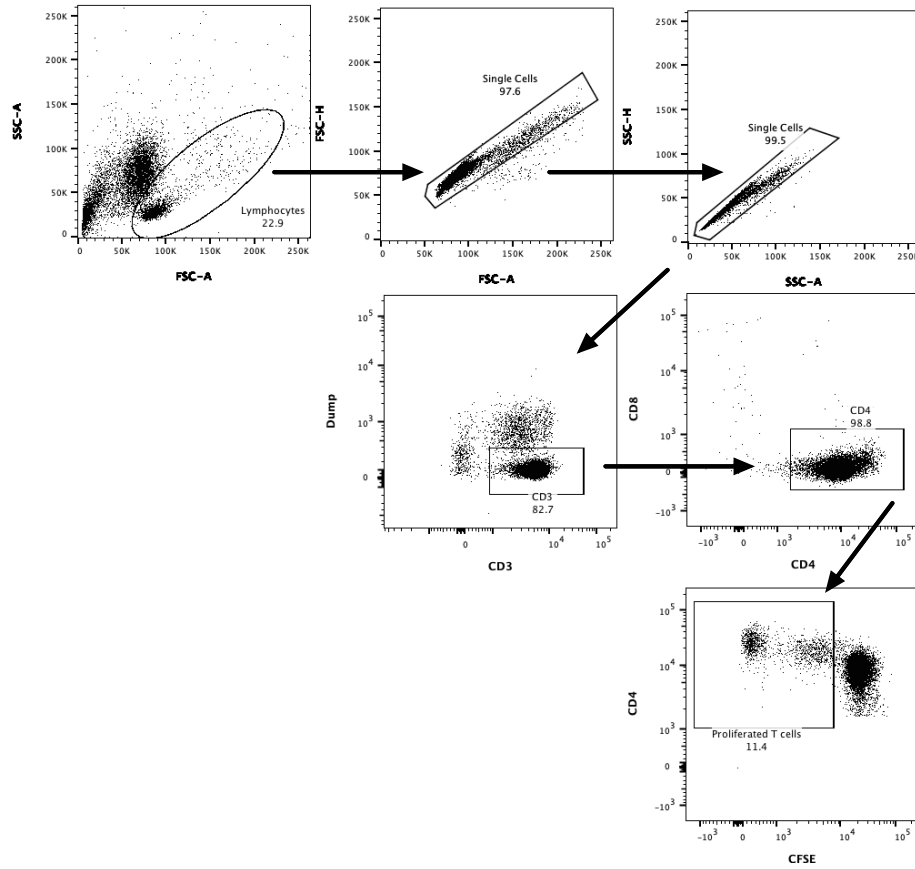

Fig S3. Gating strategy adopted to measure the percentage proliferated CD4<sup>+</sup> T cells. CD4<sup>+</sup>CFSE<sup>-</sup> T cells represented the proliferated CD4<sup>+</sup> T cells upon stimulation.

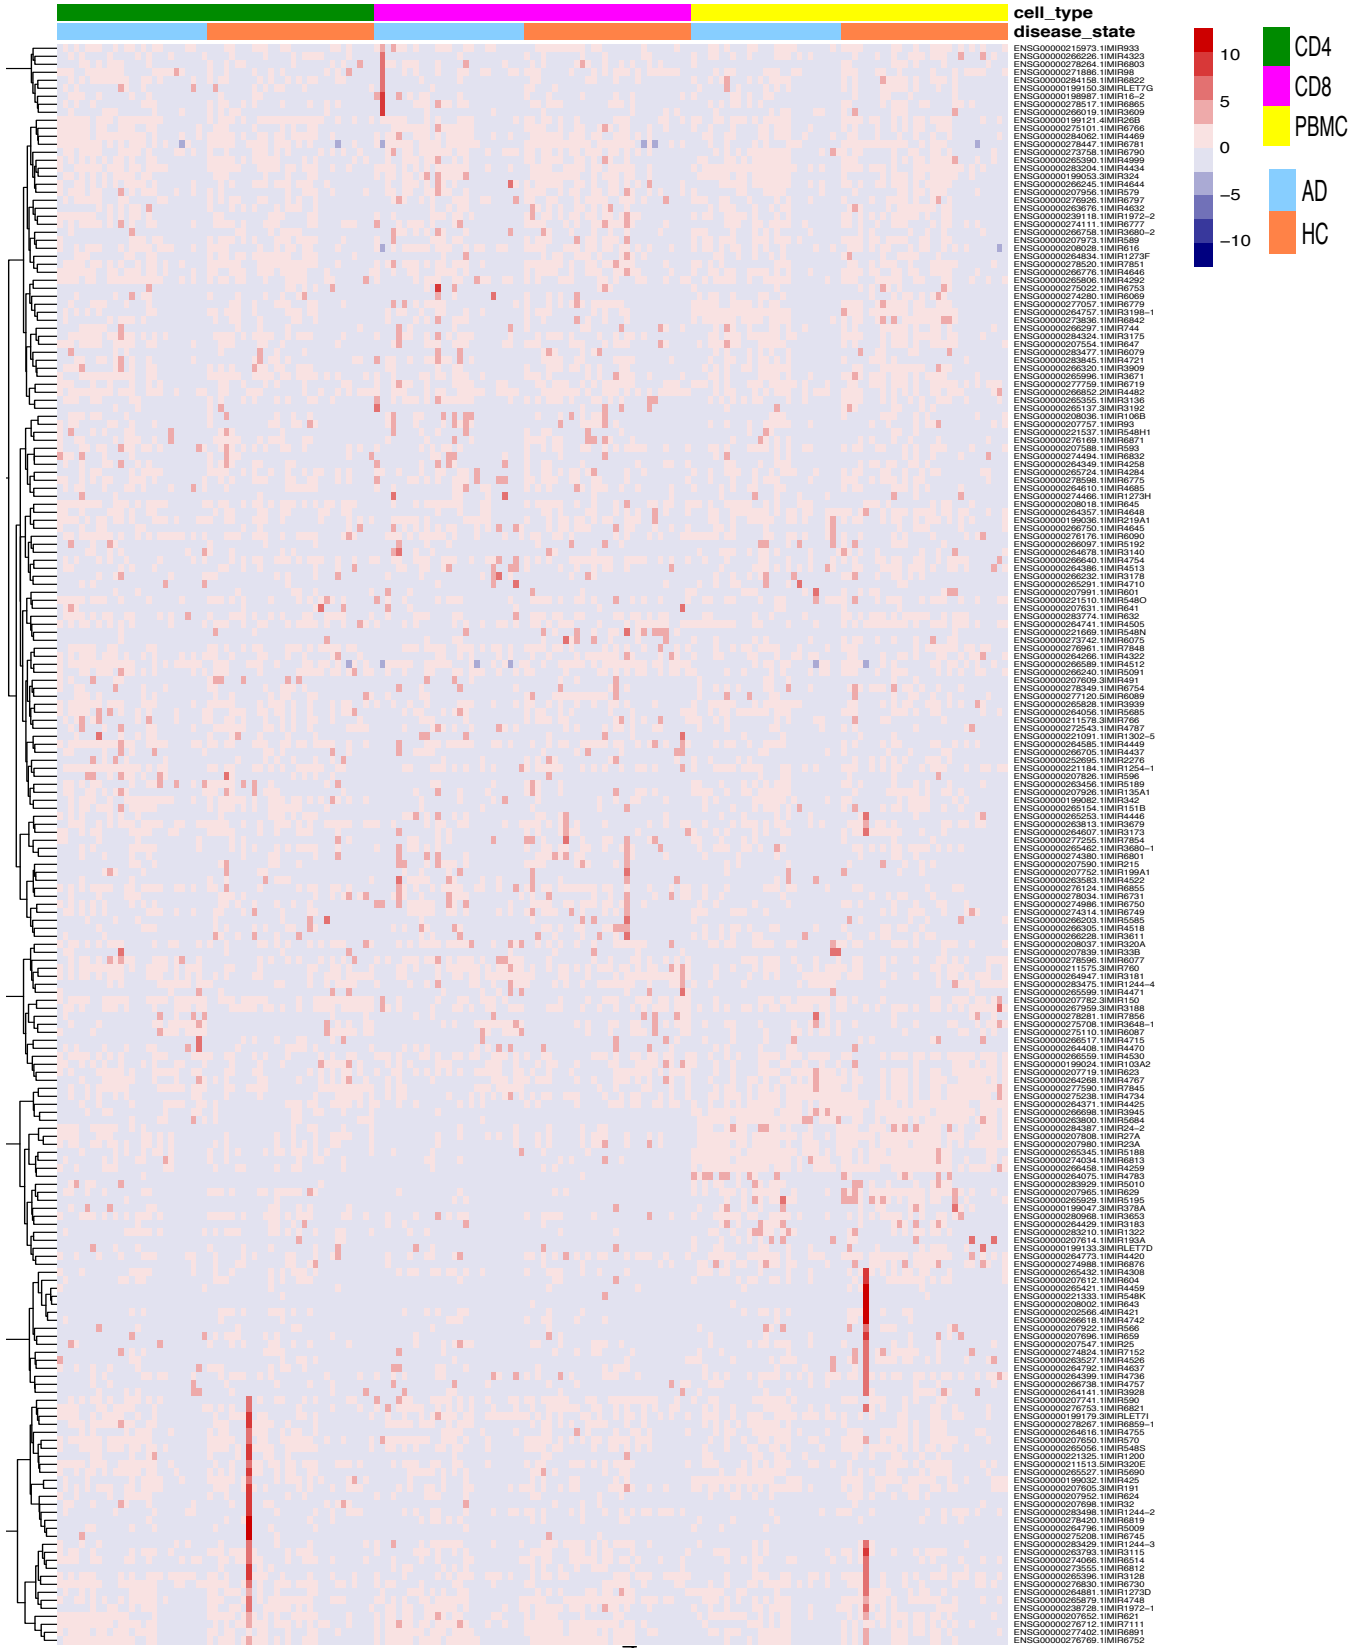

**Fig S4.** Heat map of top 200 variable miRNAs in PBMCs (yellow bar), CD4 memory (green bar) and CD8 memory (pink bar) T cell subsets showing no difference in expression of miRNAs between AD (blue bar) and HC subjects (orange bar).

**Table S1. Top 100 variable genes across PBMCs, CD4 and CD8 memory T cells.**

| No. | Gene ID            | Gene name | CD4 memory T cells (AD vs. HC) |      | CD8 memory T cells (AD vs. HC) |       | PBMC (AD vs. HC) |      |
|-----|--------------------|-----------|--------------------------------|------|--------------------------------|-------|------------------|------|
|     |                    |           | Log2FC                         | Padj | Log2FC                         | Padj  | Log2FC           | Padj |
| 1   | ENSG00000224397.5  | SMIM25    | -0.42                          | 0.77 | 0.44                           | 0.95  | -0.02            | 1    |
| 2   | ENSG00000110077.14 | MS4A6A    | -0.33                          | 0.84 | 0.01                           | 1     | 0.11             | 1    |
| 3   | ENSG00000112799.8  | LY86      | -0.36                          | 0.81 | 0.32                           | 1     | -0.04            | 1    |
| 4   | ENSG00000197249.13 | SERPINA1  | -0.25                          | 0.89 | 0.09                           | 1     | -0.07            | 1    |
| 5   | ENSG00000158869.10 | FCER1G    | -0.25                          | 0.9  | 0.12                           | 1     | 0.16             | 1    |
| 6   | ENSG00000204472.12 | AIF1      | -0.26                          | 0.88 | 0.05                           | 1     | -0.08            | 1    |
| 7   | ENSG00000163220.10 | S100A9    | -0.2                           | 0.93 | 0.08                           | 1     | 0                | 1    |
| 8   | ENSG00000143546.9  | S100A8    | -0.32                          | 0.86 | 0.01                           | 1     | 0.04             | 1    |
| 9   | ENSG00000163221.8  | S100A12   | -0.28                          | 0.87 | -0.01                          | 1     | 0.02             | 1    |
| 10  | ENSG00000101439.8  | CST3      | -0.38                          | 0.8  | -0.01                          | 1     | -0.08            | 1    |
| 11  | ENSG00000124731.12 | TREM1     | -0.02                          | 0.99 | -0.29                          | 1     | 0.19             | 1    |
| 12  | ENSG00000170458.13 | CD14      | -0.07                          | 0.98 | -0.21                          | 1     | 0.08             | 1    |
| 13  | ENSG00000090382.6  | LYZ       | -0.42                          | 0.77 | 0.07                           | 1     | 0.3              | 1    |
| 14  | ENSG00000085265.10 | FCN1      | -0.19                          | 0.91 | 0.2                            | 1     | 0.13             | 1    |
| 15  | ENSG00000119535.17 | CSF3R     | -0.23                          | 0.9  | -0.2                           | 1     | -0.03            | 1    |
| 16  | ENSG00000121316.10 | PLBD1     | -0.26                          | 0.87 | -0.08                          | 1     | 0.07             | 1    |
| 17  | ENSG00000175489.9  | LRRC25    | -0.23                          | 0.9  | -0.03                          | 1     | -0.13            | 1    |
| 18  | ENSG00000066336.11 | SPI1      | -0.22                          | 0.9  | -0.11                          | 1     | 0                | 1    |
| 19  | ENSG00000172243.17 | CLEC7A    | -0.22                          | 0.92 | -0.13                          | 1     | 0.13             | 1    |
| 20  | ENSG00000133246.11 | PRAM1     | -0.38                          | 0.79 | -0.59                          | 0.047 | 0.11             | 1    |
| 21  | ENSG00000186818.12 | LILRB4    | -0.27                          | 0.83 | -0.64                          | 1     | 0.07             | 1    |
| 22  | ENSG00000165168.7  | CYBB      | -0.21                          | 0.91 | -0.05                          | 0.67  | 0.01             | 1    |
| 23  | ENSG00000197629.5  | MPEG1     | -0.2                           | 0.92 | -0.03                          | 1     | -0.01            | 1    |
| 24  | ENSG00000143226.13 | FCGR2A    | -0.12                          | 0.95 | 0.07                           | 1     | 0.06             | 1    |
| 25  | ENSG00000085514.15 | PILRA     | -0.22                          | 0.91 | 0.18                           | 1     | -0.02            | 1    |
| 26  | ENSG00000187116.13 | LILRA5    | -0.12                          | 0.96 | 0.36                           | 1     | 0.05             | 1    |
| 27  | ENSG00000111275.12 | ALDH2     | -0.3                           | 0.86 | 0.08                           | 1     | -0.17            | 1    |
| 28  | ENSG00000106066.14 | CPVL      | -0.27                          | 0.88 | -0.03                          | 1     | -0.09            | 1    |
| 29  | ENSG00000131042.14 | LILRB2    | -0.17                          | 0.93 | 0.37                           | 1     | 0.15             | 1    |
| 30  | ENSG00000111321.10 | LTBR      | -0.13                          | 0.94 | 0.34                           | 1     | -0.04            | 1    |
| 31  | ENSG00000158825.5  | CDA       | -0.26                          | 0.87 | 0.1                            | 1     | 0.09             | 1    |
| 32  | ENSG00000214212.8  | C19orf38  | -0.15                          | 0.94 | 0.33                           | 1     | 0.01             | 1    |
| 33  | ENSG00000038427.15 | VCAN      | -0.25                          | 0.9  | -0.12                          | 1     | 0.1              | 1    |
| 34  | ENSG00000239998.5  | LILRA2    | -0.18                          | 0.92 | 0.18                           | 1     | 0.06             | 1    |
| 35  | ENSG00000161955.16 | TNFSF13   | -0.24                          | 0.87 | 0.13                           | 1     | 0                | 1    |
| 36  | ENSG00000101336.13 | HCK       | -0.24                          | 0.89 | 0.01                           | 1     | 0.03             | 1    |
| 37  | ENSG00000161642.17 | ZNF385A   | -0.31                          | 0.85 | 0.1                            | 1     | -0.01            | 1    |
| 38  | ENSG00000235568.6  | NFAM1     | -0.22                          | 0.9  | 0.03                           | 1     | -0.15            | 1    |
| 39  | ENSG00000186074.18 | CD300LF   | -0.07                          | 0.98 | -0.04                          | 1     | -0.1             | 1    |
| 40  | ENSG00000198053.11 | SIRPA     | -0.16                          | 0.94 | -0.03                          | 0.96  | -0.17            | 1    |
| 41  | ENSG00000006534.15 | ALDH3B1   | -0.14                          | 0.95 | -0.17                          | 1     | -0.11            | 1    |
| 42  | ENSG00000204103.3  | MAFB      | -0.41                          | 0.79 | 0.19                           | 1     | -0.02            | 1    |
| 43  | ENSG00000126759.13 | CFP       | -0.41                          | 0.77 | 0.14                           | 1     | 0.04             | 1    |
| 44  | ENSG00000168461.12 | RAB31     | -0.42                          | 0.79 | 0.1                            | 1     | 0.08             | 1    |
| 45  | ENSG00000135218.17 | CD36      | -0.28                          | 0.86 | 0.15                           | 1     | 0.19             | 1    |

|    |                    |          |       |      |       |       |       |   |
|----|--------------------|----------|-------|------|-------|-------|-------|---|
| 46 | ENSG00000169403.11 | PTAFR    | -0.29 | 0.87 | 0.05  | 1     | -0.06 | 1 |
| 47 | ENSG00000136826.14 | KLF4     | -0.22 | 0.91 | 0.05  | 1     | 0.18  | 1 |
| 48 | ENSG00000123689.5  | GOS2     | -0.24 | 0.9  | -0.08 | 1     | -0.18 | 1 |
| 49 | ENSG00000216490.3  | IFI30    | -0.55 | 0.66 | 0.06  | 1     | -0.15 | 1 |
| 50 | ENSG00000185215.8  | TNFAIP2  | -0.46 | 0.75 | -0.27 | 1     | -0.3  | 1 |
| 51 | ENSG00000131401.11 | NAPSB    | -0.31 | 0.86 | -0.06 | 1     | 0.04  | 1 |
| 52 | ENSG00000197405.7  | C5AR1    | -0.02 | 1    | -0.08 | 1     | 0.16  | 1 |
| 53 | ENSG00000171051.8  | FPR1     | 0.01  | 1    | -0.64 | 0.39  | 0.14  | 1 |
| 54 | ENSG00000155465.18 | SLC7A7   | -0.08 | 0.98 | 0.07  | 1     | -0.01 | 1 |
| 55 | ENSG00000165025.14 | SYK      | -0.13 | 0.96 | 0.16  | 1     | 0.05  | 1 |
| 56 | ENSG00000100292.16 | HMOX1    | -0.12 | 0.96 | 0.43  | 0.76  | -0.2  | 1 |
| 57 | ENSG00000196576.14 | PLXNB2   | -0.06 | 0.98 | -0.52 | 0.073 | -0.24 | 1 |
| 58 | ENSG00000120708.16 | TGFBI    | -0.15 | 0.95 | 0.13  | 1     | -0.06 | 1 |
| 59 | ENSG00000116701.14 | NCF2     | -0.17 | 0.94 | -0.13 | 1     | -0.05 | 1 |
| 60 | ENSG00000161944.16 | ASGR2    | -0.34 | 0.81 | -0.63 | 1     | -0.06 | 1 |
| 61 | ENSG00000135929.8  | CYP27A1  | -0.23 | 0.88 | -0.64 | 0.24  | -0.23 | 1 |
| 62 | ENSG00000182511.11 | FES      | -0.3  | 0.82 | 0.31  | 1     | 0.2   | 1 |
| 63 | ENSG00000160883.10 | HK3      | -0.13 | 0.97 | -0.27 | 1     | -0.03 | 1 |
| 64 | ENSG00000146094.13 | DOK3     | -0.05 | 0.99 | -0.02 | 1     | -0.14 | 1 |
| 65 | ENSG00000166428.12 | PLD4     | -0.24 | 0.9  | -0.63 | 0.4   | 0.07  | 1 |
| 66 | ENSG00000186407.6  | CD300E   | -0.14 | 0.95 | 0.65  | 0.25  | -0.13 | 1 |
| 67 | ENSG00000011422.11 | PLAUR    | -0.3  | 0.87 | -0.15 | 1     | -0.04 | 1 |
| 68 | ENSG00000123384.13 | LRP1     | -0.06 | 0.98 | 0.41  | 1     | 0.1   | 1 |
| 69 | ENSG00000171236.9  | LRG1     | -0.39 | 0.76 | -0.01 | 1     | -0.27 | 1 |
| 70 | ENSG00000128383.12 | APOBEC3A | -0.09 | 0.95 | 0.27  | 1     | 0.19  | 1 |
| 71 | ENSG00000197766.7  | CFD      | -0.22 | 0.91 | 0.01  | 1     | -0.12 | 1 |
| 72 | ENSG00000100079.6  | LGALS2   | -0.2  | 0.92 | 0.22  | 1     | 0.11  | 1 |
| 73 | ENSG00000152804.10 | HHEX     | -0.29 | 0.86 | 0.16  | 1     | 0     | 1 |
| 74 | ENSG00000166825.13 | ANPEP    | -0.22 | 0.91 | 0     | 0.94  | -0.05 | 1 |
| 75 | ENSG00000175591.11 | P2RY2    | -0.22 | 0.89 | 0.16  | 1     | -0.3  | 1 |
| 76 | ENSG00000146192.14 | FGD2     | -0.68 | 0.59 | -0.41 | 1     | -0.21 | 1 |
| 77 | ENSG00000128604.19 | IRF5     | -0.28 | 0.87 | -0.07 | 1     | -0.27 | 1 |
| 78 | ENSG00000125538.11 | IL1B     | -0.42 | 0.79 | 0.36  | 1     | -0.07 | 1 |
| 79 | ENSG00000113749.7  | HRH2     | -0.25 | 0.89 | -0.04 | 1     | -0.16 | 1 |
| 80 | ENSG00000140678.16 | ITGAX    | -0.24 | 0.91 | 0.37  | 1     | 0     | 1 |
| 81 | ENSG00000254415.3  | SIGLEC14 | -0.17 | 0.92 | 0.29  | 0.52  | 0.08  | 1 |
| 82 | ENSG00000173372.16 | C1QA     | -0.04 | 0.98 | 0.26  | 0.39  | 0.08  | 1 |
| 83 | ENSG00000011600.11 | TYROBP   | -0.15 | 0.95 | 0     | 1     | 0.02  | 1 |
| 84 | ENSG00000106565.17 | TMEM176B | -0.5  | 0.68 | 0.37  | 1     | -0.15 | 1 |
| 85 | ENSG00000002933.7  | TMEM176A | -0.43 | 0.72 | 0.03  | 1     | -0.16 | 1 |
| 86 | ENSG00000148344.10 | PTGES    | 0     | 1    | -0.29 | 1     | -0.06 | 1 |
| 87 | ENSG00000211899.9  | IGHM     | -0.03 | 0.99 | 0.38  | 1     | 1.04  | 1 |
| 88 | ENSG00000211677.2  | IGLC2    | 0.02  | 0.99 | -0.06 | 1     | 1.27  | 1 |
| 89 | ENSG00000211895.5  | IGHA1    | -0.59 | 0.86 | -0.68 | 1     | -0.21 | 1 |
| 90 | ENSG00000211592.8  | IGKC     | -0.41 | 0.77 | -0.19 | 1     | -0.3  | 1 |
| 91 | ENSG00000211898.7  | IGHD     | -0.34 | 0.8  | 0.21  | 1     | 0.2   | 1 |
| 92 | ENSG00000105369.9  | CD79A    | 0.06  | 0.98 | -0.25 | 1     | 0.25  | 1 |
| 93 | ENSG00000010610.9  | CD4      | 0.03  | 0.99 | -0.04 | 1     | -0.13 | 1 |
| 94 | ENSG00000244734.3  | HBB      | 0.44  | 0.72 | 0.23  | 1     | 0.1   | 1 |
| 95 | ENSG00000188536.12 | HBA2     | 0.35  | 0.79 | 0.21  | 1     | -0.03 | 1 |

|     |                    |        |      |      |       |   |       |   |
|-----|--------------------|--------|------|------|-------|---|-------|---|
| 96  | ENSG00000129824.15 | RPS4Y1 | 0.19 | 0.92 | 0.07  | 1 | 0.02  | 1 |
| 97  | ENSG00000099725.14 | PRKY   | 0.11 | 0.96 | 0.05  | 1 | 0.03  | 1 |
| 98  | ENSG00000172116.21 | CD8B   | 0.06 | 0.99 | 0     | 1 | -0.34 | 1 |
| 99  | ENSG00000153563.15 | CD8A   | 0.48 | 0.76 | -0.03 | 1 | -0.39 | 1 |
| 100 | ENSG00000100453.12 | GZMB   | 0.42 | 0.79 | 0.15  | 1 | 0.39  | 1 |
